# Supplementary material
Source: publisher figshare collection journal article supplement (https://gsapubs.figshare.com/ndownloader/files/33525212)
Supplement: Supplementary file 1 [file 33525212]

## Sheet: Sheet1
Table DR3. Comparison of detrital zircon CA-ID-TIMS and LA-ICP-MS dates from the same crystals
		CA-ID-TIMS					LA-ICP-MS
Sample		207Pb/206Pb	± 2σ	206Pb/238U	± 2σ		Spot #	207Pb/206Pb	± 2σ	206Pb/238U	± 2σ
SC18-1	z1	992.883	1.59345	992.512	0.641322		ML7	936.36	84.2475	980.671	21.9603
SC18-1	z2a	1036.23	2.47056	1035.45	0.849751		ML72	972.71	157.869	1002.56	38.9966
SC18-1	z2b	1035.28	13.5928	1035.85	3.22297		ML72	972.71	157.869	1002.56	38.9966
SC18-1	z3	1081.21	1.62335	1080.33	0.722015		ML83	1020.99	117.99	1102.13	39.2219
SC18-1	z4	1019.45	1.78832	1017.71	0.694289		ML95	991.208	81.0255	1026.15	29.5793
SC18-1	z5a	1024.51	14.5326	1031.61	2.75326		ML101	1005.32	78.7272	1063.24	36.5727
SC18-1	z5b	1038.85	16.2632	1033.44	3.27439		ML101	1005.32	78.7272	1063.24	36.5727
SC18-1	z6	1076.06	2.12821	1074.22	1.01512		ML105	1008.64	77.1414	1087.97	27.0103
SC18-1	z7a	1096.61	1.25973	1095.62	0.719654		ML252	1034.59	57.9443	1102.9	24.7717
SC18-1	z7b	1096.14	1.8113	1095.45	0.790838		ML252	1034.59	57.9443	1102.9	24.7717
SC18-1	z7c	1101.25	5.05851	1096.15	1.32249		ML252	1034.59	57.9443	1102.9	24.7717
SC18-1	z8a	1042.08	1.33024	1042.04	0.665716		ML190	1036.18	43.0206	1007.61	38.0852
SC18-1	z8b	1046.24	1.44911	1049.48	0.854517		ML190	1036.18	43.0206	1007.61	38.0852
SC18-1	z9	1077.09	12.2166	1074.14	4.15733		M178	1007.18	106.716	1053.41	44.9497
SC18-1	z10	1032.08	1.54007	1032.25	0.689065		M213	1002.16	74.2463	1022.47	36.4279
SC18-1	z11	1021.13	1.89647	1019.58	0.725963		M234	1017.13	75.9094	981.067	44.3446
NW1-61.5	z1	1092.29	2.1214	1090.3	0.790107		ML60	1042.37	87.4729	1126.95	32.8841
NW1-61.5	z2a	1084.35	3.47972	1082.1	1.01774		ML58	1060.38	87.4228	911.112	66.5186
NW1-61.5	z2b	1084.73	3.85468	1083.31	0.930599		ML58	1060.38	87.4228	911.112	66.5186
AF1-29.3	z1	1032.78	1.79818	1028.77	0.716747		S93	1009.84	107.796	1038.54	31.9577
AF1-29.3	z2	1000.29	8.42707	1003.31	2.23381		S226	946.083	214.221	991.886	43.1754
AF1-29.3	z3	1036.87	3.06583	1033.89	0.922267		S220	989.67	114.099	1023.38	25.9585
AF1-29.3	z4-UD	1051.44	30.2807	1040.63	3.5528		S216	1007.41	109.821	1038.88	41.0975
AF1-29.3	z4	1051.44	30.2807	1040.2	4.97728		S216	1007.41	109.821	1038.88	41.0975
AF1-29.3	z6	1025.6	14.9487	1017.67	2.94851		S160	1009.89	179.881	1025.74	29.407
AF1-29.3	z7	1070.65	4.65719	1073.22	1.16942		S164	1029.9	141.638	1065.49	27.8763
UD indicates that Uranium isotopes were measured on an ion-counting Daly detector.
In all other cases, Uranium isotopes were measured on Faraday mode ohm resistors.

## Sheet: G49439
Hodgin, E.B., et al., 2022, Final inversion of the Midcontinent Rift during the Rigolet Phase of the Grenvillian Orogeny: Geology, https://doi.org/10.1130/G49439.1
